# Supplementary material
Source: HighWire-hosted journal article supplement (doi:10.1101/rna.062661.117)
Supplement: Supplemental_Tables_S1-S5.docx [file Supplemental_Tables_S1-S5.docx]

**Table S1. Data used in this study.**

| **Sample** | **Strain** | **Tissue** | **Method** | **No. of PAS reads** |
| --- | --- | --- | --- | --- |
| 1 | wt | Body | 3’READS, replicate 1 | 7,142,301 |
| 2 | wt | Head | 3’READS, replicate 1 | 3,821,065 |
| 3 | wt | Body | 3’READS, replicate 2 | 2,219,693 |
| 4 | wt | Head | 3’READS, replicate 2 | 2,461,527 |
| 5 | wt | Head | 3’READS+, replicate 1 | 7,885,275 |
| 6 | wt | Head | 3’READS+, replicate 2 | 6,346,523 |
| 7 | *RpII215C4* | Head | 3’READS+, replicate 1 | 7,633,895 |
| 8 | *RpII215C4* | Head | 3’READS+, replicate 2 | 8,738,865 |
| 9 | wt | Body | 3’READS+, replicate 1 | 8,591,047 |
| 10 | wt | Body | 3’READS+, replicate 2 | 8,527,199 |
| 11 | *RpII215C4* | Body | 3’READS+, replicate 1 | 6,146,194 |
| 12 | *RpII215C4* | Body | 3’READS+, replicate 2 | 9,062,730 |

**Table S2. Primers used in this study.**

| **Gene** | **Primer sequence** |
| --- | --- |
| *rp49* | Fwd-ATCGGTTACGGATCGAACAA; Rev-GACAATCTCCTTGCGCTTCT |
| *IA-2* coding | Fwd-CACCACCAAGGAGCCTCTAA; Rev-TTACTTCTTCGCCTGCTTCG |
| *IA-2* dPAS | Fwd-TTGACACGCATGTTTTCCAT; Rev-TTTTTGTTGGTTGCATTGGA |
| *rassf8* coding | Fwd-CCCACGAGTTGGATGCTATT; Rev-AGCAAGCGCATTTTGTTCTT |
| *rassf8* dPAS | Fwd-TTAGCCTTAGCCACCGGATA; Rev-ATTGCATTTCCGTTGGTGTT |
| *slmo* coding | Fwd-TCGGAGCACATATTCAACCA; Rev-GTCCACTTGGGGAAGTACCA |
| *slmo* dPAS | Fwd-CGACCAGCCAGTGTCAAGT; Rev-AGTTGCACATGCGAACGTC |

Fwd, forward primer; Rev, reverse primer

**Table S3. Top biological process GO terms enriched for genes with longer 3’UTRs in the head**

| **GO Term** | **-log10(*P*)** |
| --- | --- |
| system development | 15.2 |
| organelle organization | 14.4 |
| macromolecule localization | 14.1 |
| cell development | 13.8 |
| cellular localization | 13.7 |
| cellular component assembly | 11.9 |
| regulation of biological quality | 10.1 |
| localization | 10.0 |
| regulation of metabolic process | 8.6 |
| cell communication | 8.3 |

*P* was based on the Fisher’s exact test.

**Table S4. Top biological process GO terms enriched for genes with downregulated UR-APA isoforms in the head**

| **GO Term** | **-log10(*P*)** |
| --- | --- |
| signaling | 29.8 |
| anatomical structure morphogenesis | 24.9 |
| system development | 20.6 |
| regulation of biological quality | 13.1 |
| response to chemical | 12.1 |
| response to external stimulus | 12.1 |
| biological adhesion | 11.0 |
| behavior | 10.1 |
| localization | 9.5 |
| protein phosphorylation | 7.8 |

*P* was based on the Fisher’s exact test.

**Table S5. Expression changes of genes coding for cleavage/polyadenylation, elongation and termination factors in *RpII215* and *w1118* strains.**

| **Function** | ***Drosophila* gene name** | **FlyBase ID** | Fold change WT body vs WT head, replicate 1 | Fold change WT body vs WT head, replicate 2 | Fold change MUT body vs WT body, replicate 1 | Fold change MUT body vs WT body, replicate 2 | Fold change MUT head vs WT head, replicate 1 | Fold change MUT head vs WT head, replicate 2 |
| --- | --- | --- | --- | --- | --- | --- | --- | --- |
| Cleavage/polyadenylation factors | *hfp* | FBgn0028577 | -6,2 | -7,4 | 1,9 | 1,6 | 1,4 | 1,5 |
| *nonA* | FBgn0004227 | -4,9 | -7,8 | 1,2 | 1,6 | 1,1 | 1,0 |
| *PNUTS* | FBgn0053526 | -3,8 | -3,1 | 1,2 | 1,1 | -1,0 | -1,1 |
| *mle* | FBgn0002774 | -3,4 | -3,0 | -3,0 | -1,5 | 1,2 | 1,3 |
| *CG10077* | FBgn0035720 | -2,9 | -3,0 | -1,2 | -1,4 | 1,2 | 1,0 |
| *eIF4A* | FBgn0001942 | -2,6 | -3,4 | -1,8 | -1,3 | 1,0 | 1,0 |
| *CG3689* | FBgn0035987 | -2,5 | -2,3 | 5,2 | 1,4 | 1,4 | 1,2 |
| *Pcf11* | FBgn0264962 | -2,0 | -1,5 | 1,4 | 1,1 | -1,2 | -1,0 |
| *CG11454* | FBgn0031224 | -2,0 | -1,6 | 1,4 | 1,2 | 1,2 | 1,8 |
| *snRNP-U1-70K* | FBgn0016978 | -1,8 | -1,4 | 1,6 | 1,1 | 1,7 | 1,2 |
| *Pp1-87B* | FBgn0004103 | -1,7 | -1,9 | 1,4 | 1,1 | 1,3 | 1,2 |
| *Ku80* | FBgn0041627 | -1,6 | -1,4 | -1,1 | -1,6 | 1,2 | 1,1 |
| *Cstf64* | FBgn0027841 | -1,6 | -2,9 | 2,7 | 2,5 | 2,5 | 1,3 |
| *Sf3a1* | FBgn0266917 | -1,6 | -2,1 | 1,6 | 1,6 | 1,6 | 1,3 |
| *Fip1* | FBgn0037255 | -1,6 | -1,8 | 1,9 | 1,1 | 1,3 | 1,2 |
| *Mtr4* | FBgn0001986 | -1,5 | -1,3 | -1,6 | -1,0 | -1,0 | -1,0 |
| *eIF3a* | FBgn0037249 | -1,5 | -1,6 | -2,0 | -1,2 | -1,3 | -1,2 |
| *Hel25E* | FBgn0014189 | -1,2 | -1,6 | -1,2 | -1,1 | 1,4 | 1,3 |
| *eIF3b* | FBgn0034237 | -1,2 | -1,5 | -1,1 | -1,0 | -1,2 | -1,1 |
| *eIF4G1* | FBgn0023213 | -1,1 | -1,2 | -1,9 | -1,2 | 1,2 | 1,1 |
| *Gem3* | FBgn0011802 | 1,4 | 1,2 | 2,7 | 1,3 | 1,1 | -1,0 |
| *bel* | FBgn0263231 | 1,7 | 1,4 | 2,7 | 1,3 | 1,0 | 1,0 |
| *Pabp2* | FBgn0005648 | 2,3 | 1,4 | 1,8 | 1,4 | 2,1 | 1,4 |
| *Rhau* | FBgn0032883 | 2,7 | 3,9 | -1,2 | -1,2 | -1,1 | -1,1 |
| *rin* | FBgn0015778 | 3,0 | 2,6 | 1,9 | 1,5 | 1,4 | 1,7 |
| *Rbfox1* | FBgn0052062 | 12,4 | 20,3 | -1,4 | -1,1 | 1,2 | 2,1 |
| Elongation factors | *NELF-B* | FBgn0027553 | -3,6 | -3,3 | -1,3 | -1,0 | -1,4 | -1,4 |
| *SC35* | FBgn0265298 | -3,3 | -2,7 | -1,1 | -1,2 | 1,2 | 1,2 |
| *NELF-A* | FBgn0038872 | -3,0 | -2,4 | -3,2 | -1,7 | 1,2 | 1,0 |
| *fs(1)h* | FBgn0004656 | -3,0 | -2,7 | -1,4 | -3,2 | -3,7 | -3,7 |
| *Cdk9* | FBgn0019949 | -2,6 | -2,4 | 1,2 | 1,2 | -1,1 | -1,3 |
| *TH1* | FBgn0010416 | -2,6 | -2,2 | 1,2 | 1,5 | -1,2 | -1,0 |
| *Ctr9* | FBgn0035205 | -2,3 | -3,2 | -2,0 | -2,2 | -1,7 | -1,9 |
| *hay* | FBgn0001179 | -2,1 | -1,4 | 3,3 | 1,0 | 1,6 | 1,3 |
| *Ssu72* | FBgn0031054 | -2,1 | -2,1 | 2,5 | 1,6 | 1,0 | 1,1 |
| *Chd1* | FBgn0250786 | -1,9 | -1,5 | 1,1 | 1,3 | 1,0 | 1,4 |
| *CycK* | FBgn0025674 | -1,9 | -1,6 | -2,1 | -1,2 | -1,0 | -1,1 |
| *MED26* | FBgn0039923 | -1,8 | -2,3 | -1,2 | -1,0 | 1,3 | 1,0 |
| *snf* | FBgn0003449 | -1,6 | -1,5 | -3,0 | -1,3 | 1,1 | 1,2 |
| *Hpr1* | FBgn0037382 | -1,5 | -1,8 | 1,0 | 1,3 | 1,1 | 1,3 |
| *eaf* | FBgn0033166 | -1,5 | -1,2 | -1,2 | -1,0 | 1,1 | 1,2 |
| *TfIIFalpha* | FBgn0010282 | -1,5 | -1,6 | 1,9 | 1,5 | -1,1 | -1,0 |
| *EloB* | FBgn0023212 | -1,4 | -1,5 | -1,3 | -1,5 | -1,3 | -1,4 |
| *EloC* | FBgn0266711 | -1,3 | -1,3 | 1,4 | 1,1 | 1,5 | 1,4 |
| *SF1* | FBgn0025571 | -1,2 | -1,7 | -5,0 | -4,5 | -29,0 | -Inf |
| *kto* | FBgn0001324 | -1,2 | -1,1 | 1,5 | 1,6 | -1,1 | -1,1 |
| *LARP7* | FBgn0260771 | 1,2 | 1,2 | 1,4 | 1,3 | 3,9 | 1,7 |
| *EloA* | FBgn0039066 | 1,4 | 1,6 | -1,5 | -1,1 | 1,3 | 1,4 |
| *Spn42Dd* | FBgn0028988 | 2,4 | 3,3 | -4,8 | -1,1 | 1,5 | 2,7 |
| *HEXIM* | FBgn0038251 | 2,6 | 1,7 | 1,9 | 1,3 | 2,6 | 1,9 |
| *Rtf1* | FBgn0034722 | 4,3 | 3,5 | -1,2 | -2,1 | 2,7 | 1,3 |
| Termination factors | *pasha* | FBgn0039861 | -Inf | -1,1 | Inf | 2,2 | 1,6 | 1,7 |
| *Trf4-1* | FBgn0030049 | -3,6 | -4,5 | -1,0 | -1,3 | -1,0 | -1,1 |
| *csul* | FBgn0015925 | -2,2 | -1,7 | 4,7 | 1,5 | 1,8 | 1,8 |
| *RpII140* | FBgn0262955 | -2,0 | -1,9 | 1,8 | 1,4 | 1,5 | 1,5 |
| *Med16* | FBgn0034707 | -2,0 | -3,4 | -Inf | -2,8 | -4,6 | -15,3 |
| *snRNP-U1-70K* | FBgn0016978 | -1,8 | -1,4 | 1,6 | 1,1 | 1,7 | 1,2 |
| *CG34183* | FBgn0085212 | -1,5 | -1,4 | 5,4 | 2,8 | -1,0 | -1,2 |
| *Med20* | FBgn0013531 | 1,0 | 1,4 | -2,1 | -1,4 | -1,2 | -5,4 |

Inf and -Inf indicate positive and negative infinity values, respectively.
